# Supplementary material for: 3-(3,5-Difluorophenyl)-1-phenyl-1<em>H</em>-pyrazole-4-carbaldehyde
Source: Preprints.org preprint supplement (doi:10.20944/preprints201807.0298.v1), 2018-07-17
Supplement: Supplementary file 1 [file supplementary]

# 3-(3,5-difluorophenyl)-1-phenyl-1*H*-pyrazole-4-carbaldehyde

Naveen Kumar<sup>1,2</sup>, Swamy Sreenivasa<sup>2,\*</sup> Vasantha Kumar<sup>1</sup> and Nadigar Revansiddappa Mohan<sup>3</sup>

<sup>1</sup> Department of Chemistry, Sri Dharmasthala Manjunatheshwara College (Autonomous), Ujire, Karnataka, INDIA

<sup>2</sup> Department Studies and Research in Organic Chemistry, Tumkur University, Tumkur, Karnataka, INDIA

<sup>2</sup> Department of Chemistry, Shridevi Post Graduate Centre, Sira Road, Tumkur-52106, Karnataka, INDIA

- SUPPLEMENTARY MATERIAL -

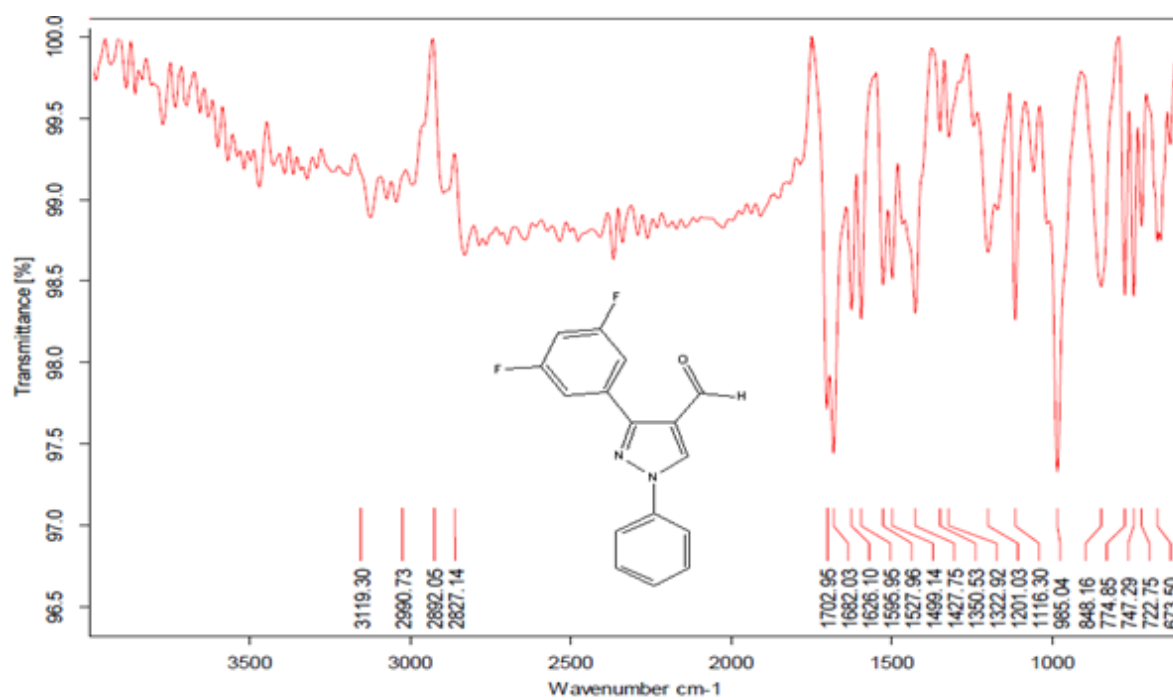

**Figure S1.** FT- IR spectra of 3-(3,5-difluorophenyl)-1-phenyl-1H-pyrazole-4-carbaldehyde (2)

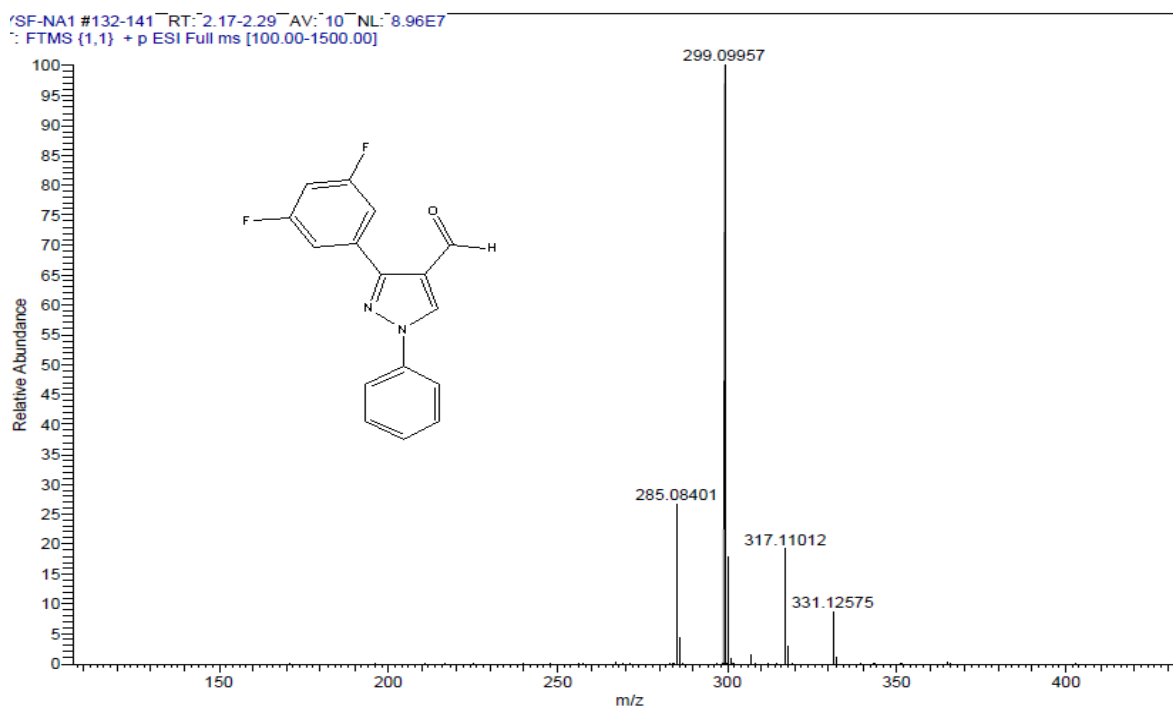

**Figure S2.** Mass spectra of 3-(3,5-difluorophenyl)-1-phenyl-1H-pyrazole-4-carbaldehyde (2) in positive ionization mode (ESI).

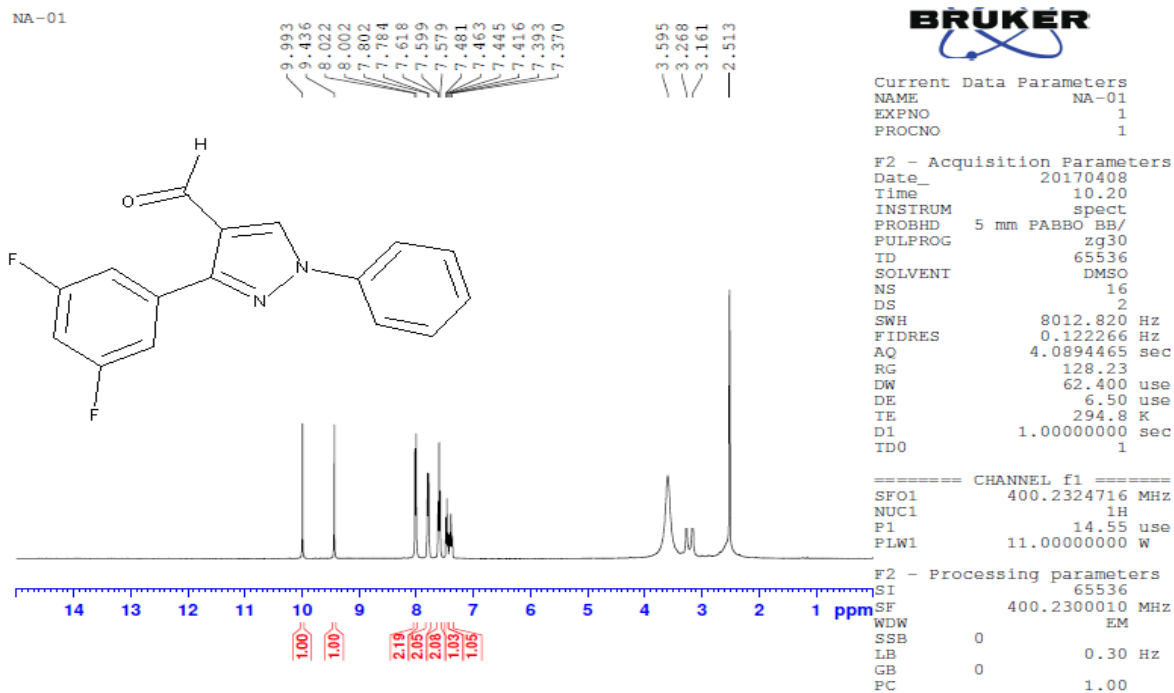

**Figure S3.**  $^1\text{H}$  NMR (400 MHz, DMSO) spectra of 3-(3,5-difluorophenyl)-1-phenyl-1H-pyrazole-4-carbaldehyde (**2**)

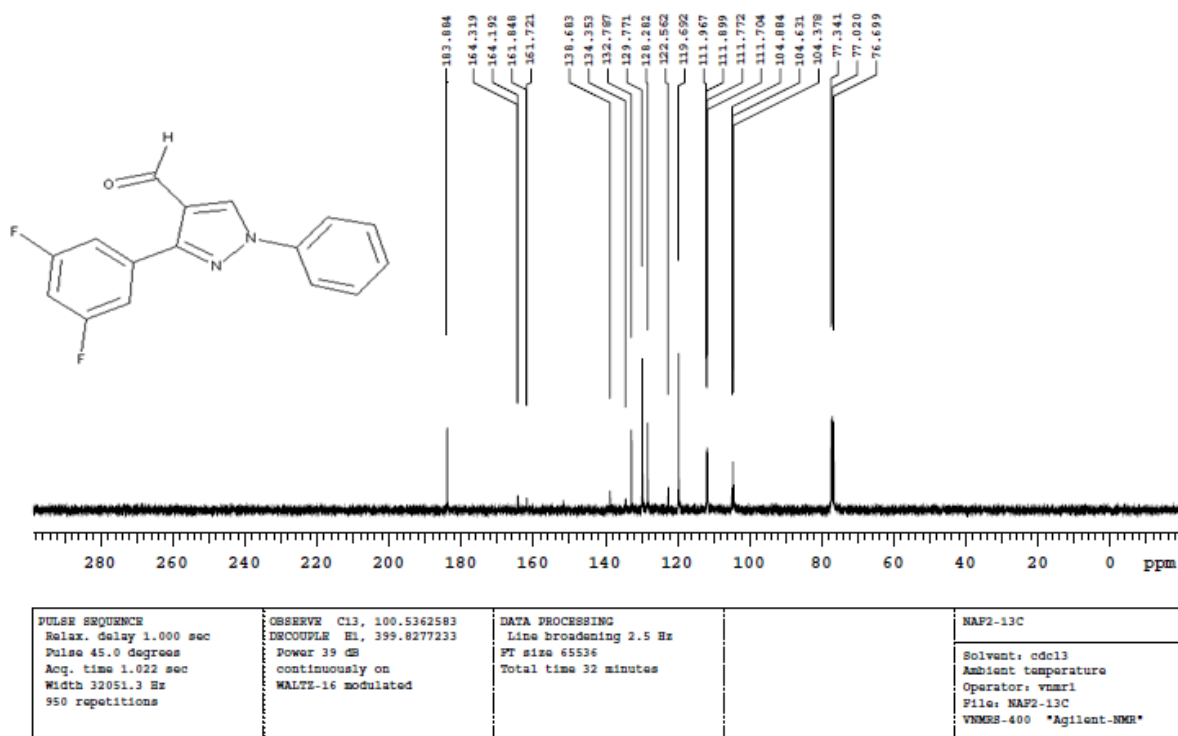

**Figure S4.**  $^{13}\text{C}$  NMR (100 MHz, DMSO) spectra of 3-(3,5-difluorophenyl)-1-phenyl-1H-pyrazole-4-carbaldehyde (**2**)
